# Supplementary material
Source: Springer Nature journal article supplement (https://www.springermedizin.de/resource/supplementary/12888_2008_538_MOESM7_ESM.pdf/9483550)

**anti-G72 #1410**

1 2 3 4 5 6 7 8 9 M

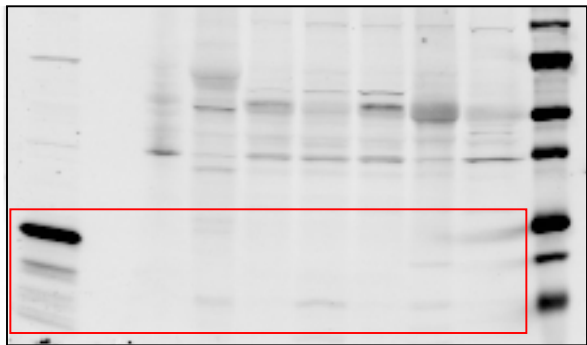

His-G72 →

**anti-actin**

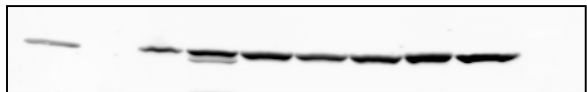

**anti-G72 #1411**

1 2 3 4 5 6 7 8 9 M

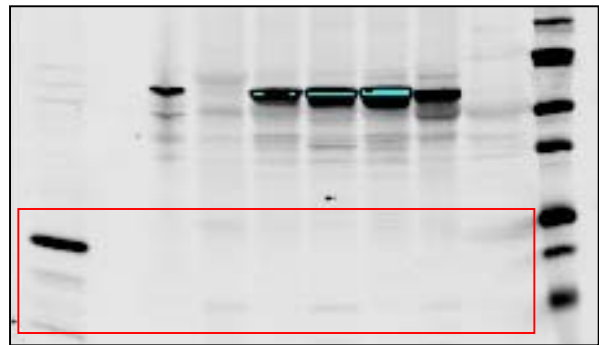

kDa

— 100  
— 75  
— 50  
— 37  
— 25  
— 20  
— 15

**anti-actin**

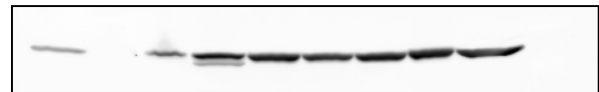

— 42

Supplement: MOESM7 [file 9483550]
